# Supplementary material for: Optimization Production of an Endo-β-1,4-Xylanase from Streptomyces thermocarboxydus Using Wheat Bran as Sole Carbon Source
Source: MDPI journal article supplement (doi:10.3390/recycling9030050), 2024-06-09
Supplement: s1 [file recycling-2966871-supplementary.pdf › recycling-2966871-supplementary.pdf]

## Supporting information

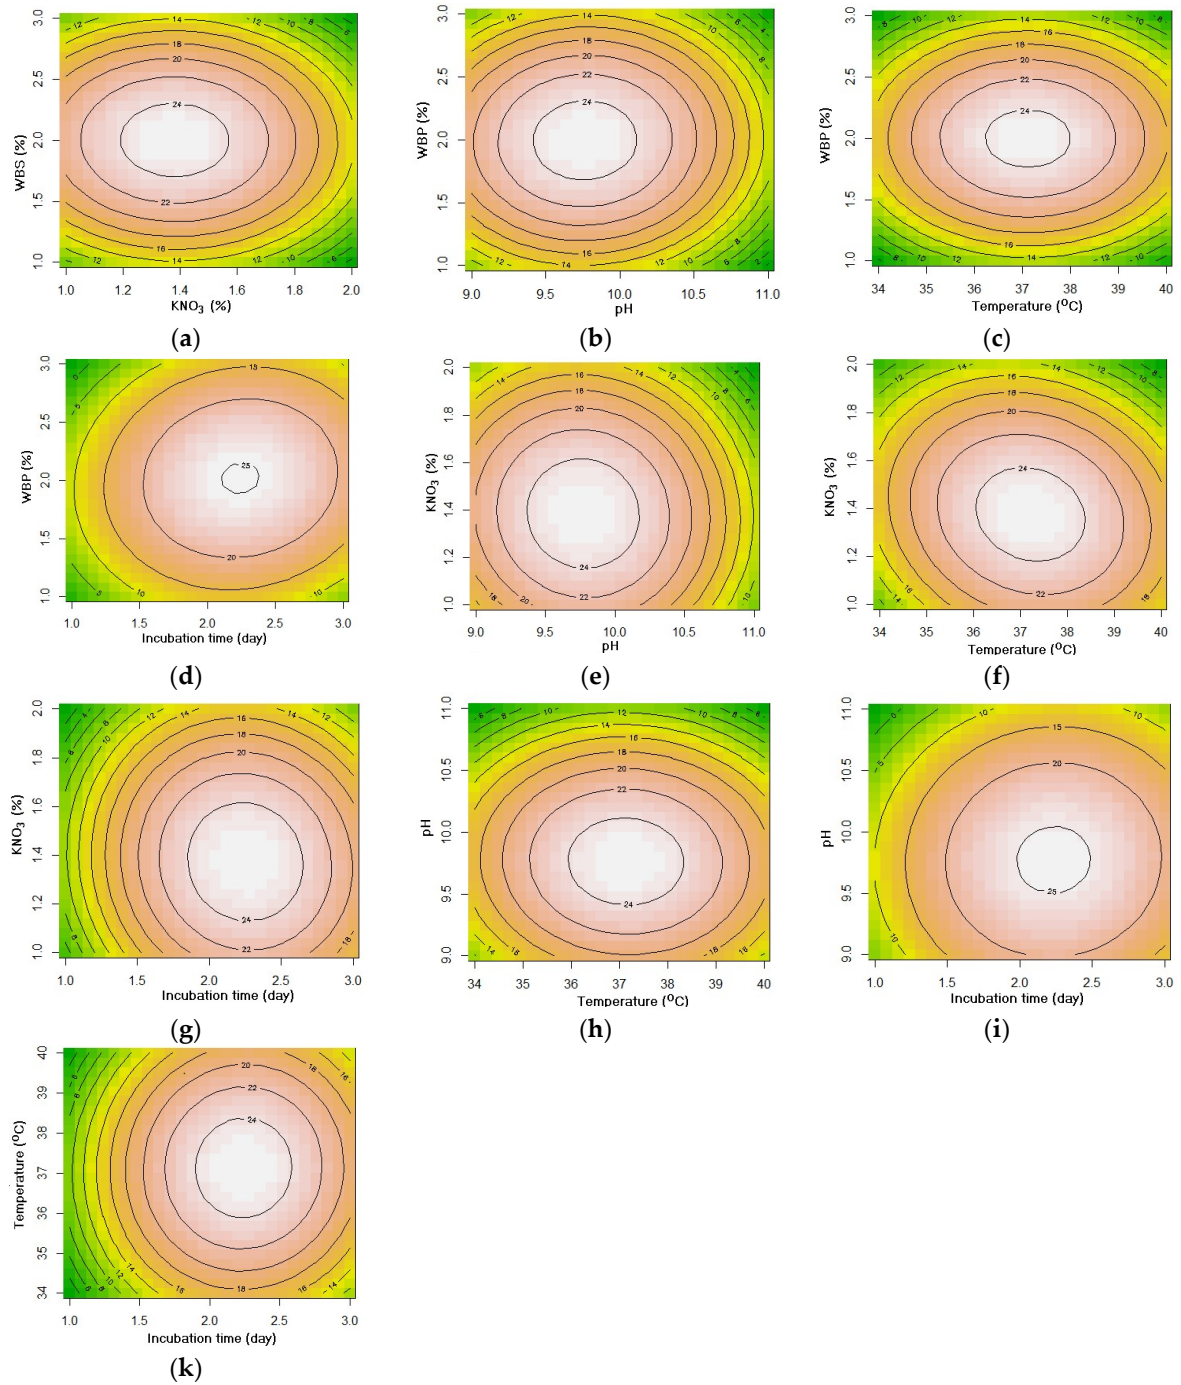

**Figure S1.** Two-dimensional (2D) contour plots showing the effect of the amount of wheat bran powder (WBP) and  $\text{KNO}_3$  (a), WBP and pH (b), WBP and temperature (c), and WBP and incubation time (d). 2D contour plots showing the effect of the amount of  $\text{KNO}_3$  and pH (e),  $\text{KNO}_3$  and temperature (f), and  $\text{KNO}_3$  and incubation time (g). 2D contour plots showing the effect of the pH and temperature (h), pH and incubation time (i), and temperature and incubation time (k).

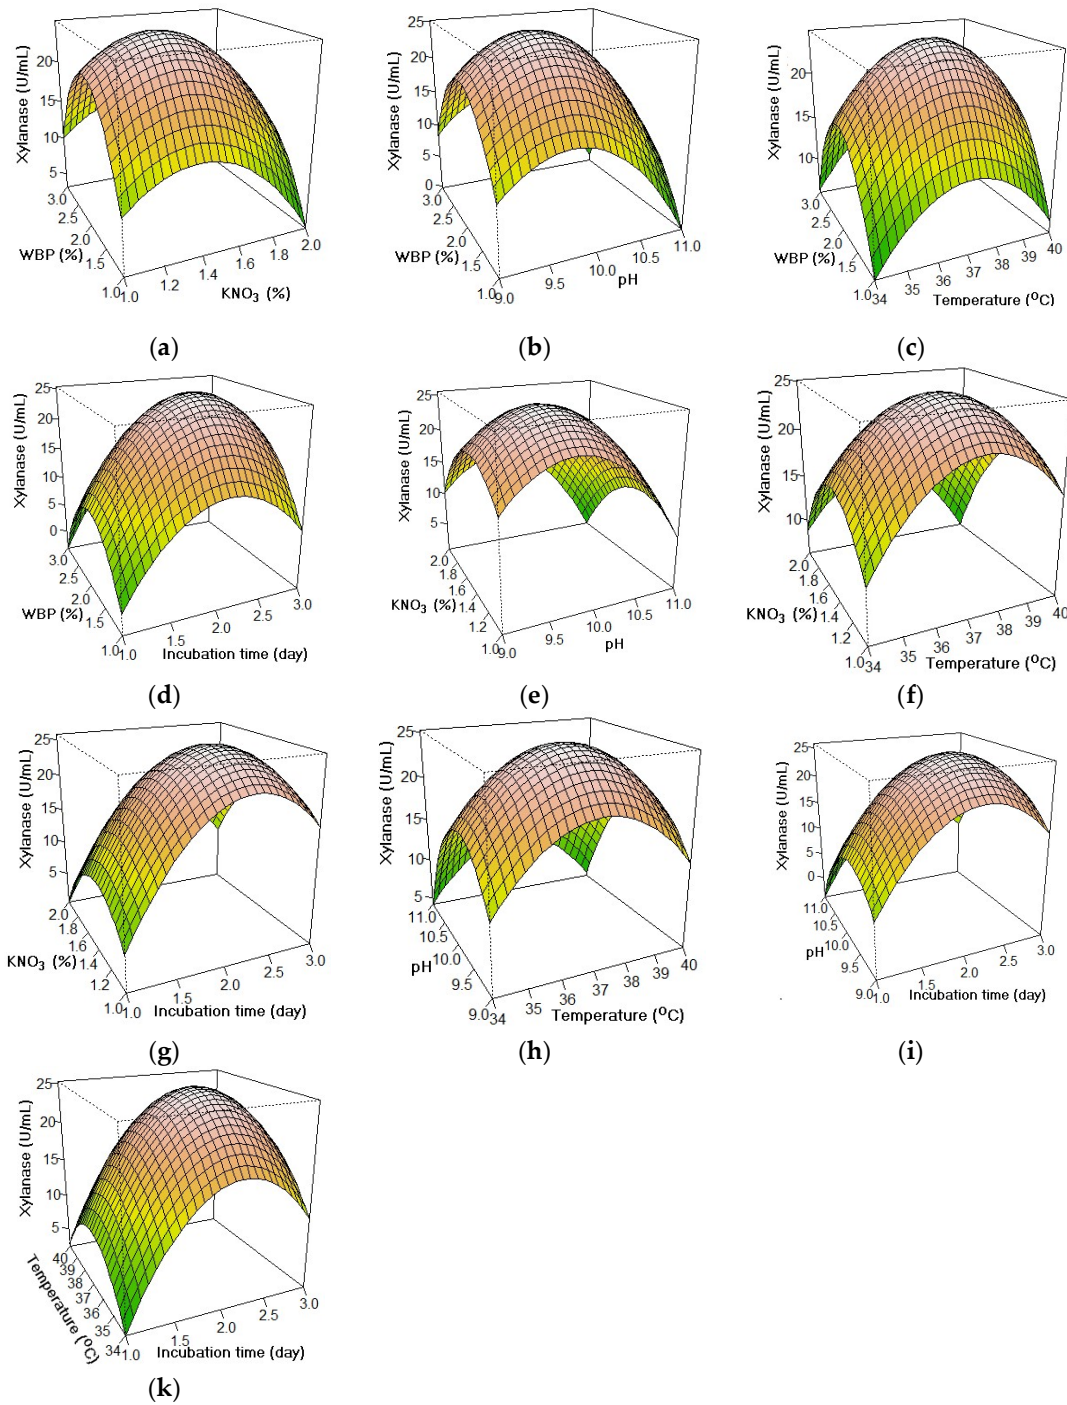

**Figure S2.** Response surface plots showing the effect of the amount of wheat bran powder (WBP) and amount of KNO<sub>3</sub> (a), WBP and pH (b), WBP and temperature (c), and WBP and incubation time (d). Response surface plots showing the effect of the amount of KNO<sub>3</sub> and pH (e), and KNO<sub>3</sub> and temperature (f), KNO<sub>3</sub> and incubation time (g). Response surface plots showing the effect of pH and temperature (h), pH and incubation time (i), and temperature and incubation time (k).

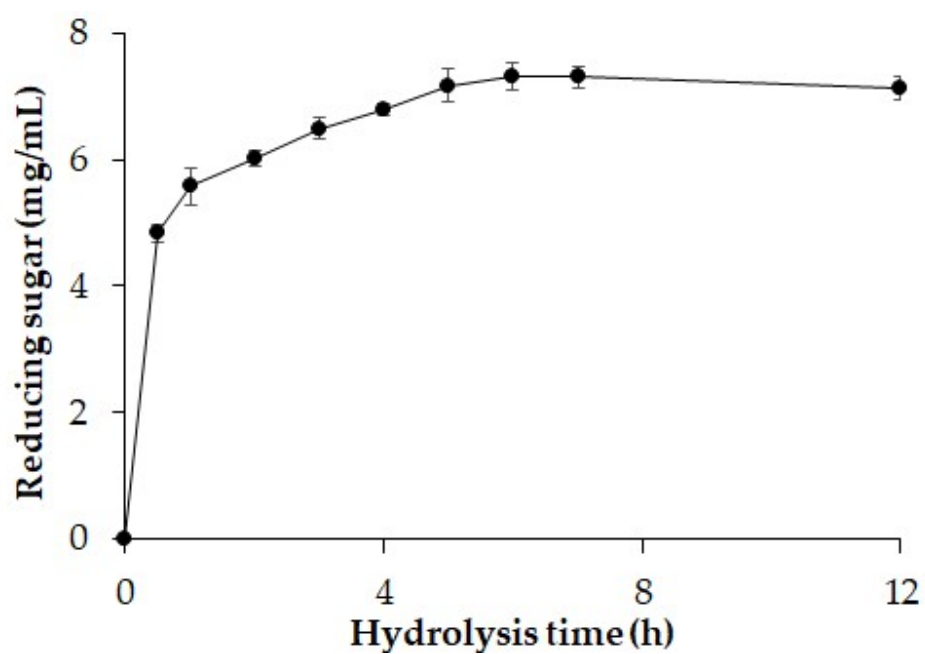

**Figure S3.** Time courses of reducing sugar production generated from the hydrolysis of xylan catalyzed by Xyn\_TKU045.

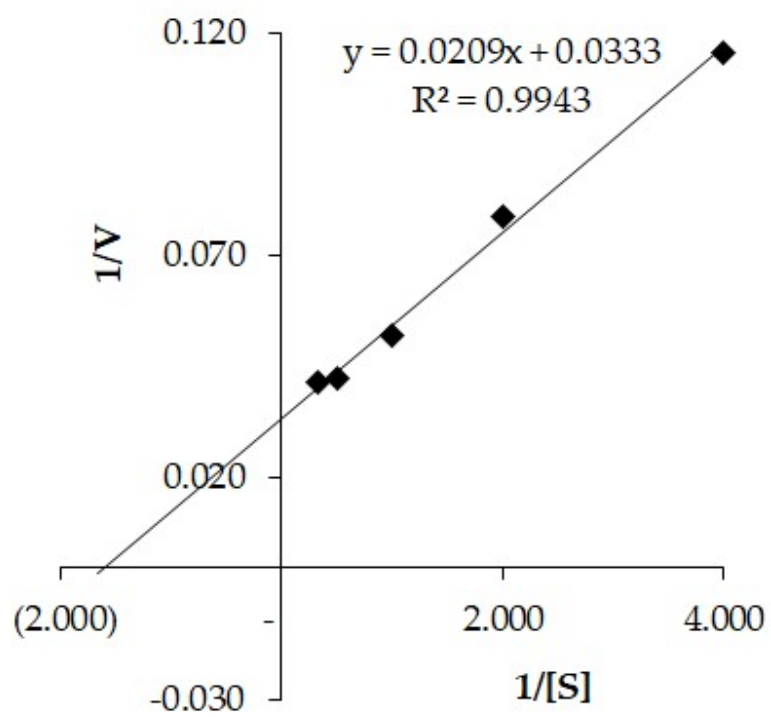

**Figure S4.** Lineweaver-Burk plots of Xyn\_TKU045.
